# Supplementary material for: A comprehensive analysis for associations between multiple microRNAs and prognosis of osteosarcoma patients
Source: PeerJ. 2020 Jan 20;8:e8389. doi: 10.7717/peerj.8389 (PMC6977468; doi:10.7717/peerj.8389)
Supplement: Supplemental Information 2 [file peerj-08-8389-s002.xls]

## Sheet: Sheet1
No.of patients	Gender	Survival time(month)	Survival status	Age(1=≤25 years,2=>25 years)	Tumor diameter(1=≤5cm,2=>5cm)	TNM stage(1=Ⅰ+Ⅱ,2=Ⅲ+Ⅳ)	Metastasis or recurrence	Differentiation	Expression levels of MiRNA-214	Expression levels of MiRNA-21	Expression levels of MiRNA-539	Expression levels of MiRNA-34a	Expression levels of MiRNA-133a	Expression levels of MiRNA-30c	Expression levels of MiRNA-433	Expression levels of MiRNA-101	Expression levels of MiRNA-218
1	Female	62	0	1	2	1	No	Well and moderate	2.56	5.79	2.79	3.53	4.22	4.37	0.7	6.6	0.6
2	Male	32	0	1	1	2	No	Well and moderate	6.47	6.7	3.7	3.44	1.13	1.28	2.61	3.51	2.51
3	Female	23	1	1	2	1	Yes	Poor	7.02	3.25	2.29	2.99	4.68	3.83	2.46	6.06	2.36
4	Male	27	0	1	1	2	No	Poor	12.5	5.73	1.73	2.47	2.16	4.31	0.64	1.54	0.54
5	Female	39	0	1	2	1	Yes	Poor	2.7	3.93	2.93	3.67	4.36	3.51	0.84	3.74	2.74
6	Male	15	1	1	1	2	Yes	Well and moderate	10.11	11.44	1.44	2.18	2.87	3.02	4.35	1.25	3.25
7	Male	13	1	1	1	2	Yes	Well and moderate	6.36	7.56	2.06	2.8	3.49	2.64	2.97	0.87	2.87
8	Male	18	1	1	1	2	Yes	Well and moderate	6.67	7.9	1	1.64	2.33	2.48	2.91	0.71	0.71
9	Female	56	0	1	2	1	Yes	Poor	2.59	4.82	3.82	4.56	7.25	3.4	6.13	6.63	6.13
10	Female	80	0	1	2	1	Yes	Poor	4.91	7.14	3.14	3.88	4.57	3.72	3.05	3.95	2.95
11	Male	52	0	2	2	2	No	Poor	7.11	8.34	1.34	4.08	1.77	1.92	3.25	4.15	3.15
12	Male	37	1	2	2	2	No	Well and moderate	8.42	9.65	1.05	2.89	3.69	2.84	0.96	0.96	2.36
13	Male	28	1	2	2	2	No	Well and moderate	6.76	7.99	1.99	2.73	3.42	4.57	3.9	2.8	3.3
14	Female	76	0	1	1	1	Yes	Well and moderate	3.72	4.95	2.95	3.69	4.38	3.53	2.86	2.76	2.76
15	Male	32	1	2	1	2	Yes	Poor	7.71	8.94	1.94	2.68	2.37	2.52	0.85	4.75	0.75
16	Female	40	1	1	2	2	No	Well and moderate	5.05	10.28	4.24	4.02	1.71	4.86	3.19	1.09	3.09
17	Male	36	1	1	1	2	Yes	Well and moderate	2.06	3.29	1.69	2.43	3.12	2.27	4.4	3.5	2.2
18	Male	29	1	1	1	2	Yes	Well and moderate	6.87	2.1	1.9	2.54	9.12	9.27	2.71	2.61	1.61
19	Female	17	1	1	2	2	Yes	Poor	4.63	5.86	1.86	2.6	3.79	3.94	1.47	3.67	2.37
20	Male	35	1	2	1	2	Yes	Poor	8.64	10.87	1.87	4.61	1.3	1.45	1.08	8.68	0.69
21	Male	42	1	2	1	2	No	Well and moderate	6.83	8.06	2.06	2.8	3.49	3.64	0.67	1.87	1.57
22	Female	68	0	1	1	1	No	Well and moderate	5.52	14.75	1.86	1.6	1.29	3.44	2.77	1.67	0.67
23	Female	48	1	1	2	1	Yes	Poor	7.26	7.49	1.49	2.23	2.12	4.27	2.4	1.3	2.3
24	Male	20	1	1	1	2	Yes	Well and moderate	7.29	8.52	2.12	3.06	1.75	1.9	2.73	3.13	1.33
25	Male	14	1	1	1	2	Yes	Well and moderate	6.34	7.47	3.27	2.01	3.7	4.85	0.68	3.08	0.58
26	Male	17	1	1	1	2	Yes	Well and moderate	6.3	7.56	4.26	4.64	3.19	2.34	2.37	3.97	2.37
27	Female	37	1	1	2	1	Yes	Poor	6.37	7.6	3.6	4.34	1.03	1.18	0.51	3.41	2.41
28	Male	43	1	1	1	2	Yes	Well and moderate	6.85	4.08	2.08	2.82	3.51	4.66	2.99	0.89	2.89
29	Female	10	1	1	2	2	Yes	Poor	2.71	7.94	0.94	3.68	2.37	2.52	0.85	3.75	0.75
30	Female	34	1	1	2	1	Yes	Poor	6.45	7.68	5.68	3.42	2.11	2.26	0.59	3.49	2.49
31	Male	65	0	1	1	1	No	Well and moderate	5.94	12.17	2.17	1.91	3.9	4.09	2.58	3.98	2.48
32	Male	52	0	1	1	1	No	Well and moderate	4.76	7.99	2.99	2.73	4.42	4.57	0.9	3.8	2.8
33	Female	82	0	1	2	2	No	Poor	7.23	7.46	1.35	4.09	9.78	7.93	6.26	1.16	4.36
34	Male	14	1	1	1	2	Yes	Well and moderate	2.84	13.07	3.57	3.81	2.5	2.65	0.48	3.88	2.38
35	Female	53	1	1	2	1	Yes	Poor	6.52	7.75	3.75	5.19	3.18	3.33	0.66	3.56	1.56
36	Female	29	1	1	1	1	Yes	Poor	9.62	11.85	0.95	3.59	2.28	2.43	0.86	3.66	0.76
37	Male	80	0	1	1	1	No	Well and moderate	6.06	8.29	0.29	3.03	7.72	7.87	3.2	3.1	3.1
38	Male	50	1	1	1	2	Yes	Well and moderate	2.15	7.48	1.08	3.72	2.41	2.56	0.39	3.79	2.39
39	Male	44	1	1	1	2	Yes	Well and moderate	1.94	2.17	1.57	4.31	2	2.15	2.48	3.38	2.29
40	Female	79	0	1	2	2	No	Poor	7.03	3.26	3.26	4	4.69	4.84	1.17	3.07	3.07
41	Female	71	0	1	2	1	No	Poor	2.45	4.68	2.68	3.42	4.11	4.26	1.59	3.49	1.49
42	Male	34	0	1	1	2	No	Well and moderate	3.73	4.96	2.96	2.7	6.39	3.54	0.87	3.77	2.77
43	Male	41	0	1	1	2	No	Well and moderate	3.96	5.19	2.39	2.93	3.62	3.77	1.1	1	3
44	Female	22	1	1	2	1	Yes	Poor	6.45	4.68	1.68	2.42	3.11	3.26	3.59	8.49	1.49
45	Female	55	1	1	2	1	Yes	Poor	6.63	7.86	1.86	2.6	1.19	4.34	2.77	0.67	0.67
46	Male	70	0	1	1	2	No	Well and moderate	9.81	3.04	3.04	3.78	3.77	3.92	2.95	3.85	0.85
47	Female	57	0	1	1	1	No	Well and moderate	6.16	8.39	1.39	2.13	3.82	4.97	3.3	3.2	1.2
48	Male	29	0	1	1	2	No	Well and moderate	7.24	6.47	2.47	3.21	2.9	7.05	2.38	3.28	2.38
49	Female	59	1	1	2	1	Yes	Poor	7.57	8.8	1.7	2.54	3.23	4.38	3.61	1.61	3.51
50	Male	36	0	1	1	2	No	Well and moderate	5.25	6.48	2.48	3.22	3.91	4.02	0.89	2.29	0.79
51	Male	29	0	2	2	2	No	Poor	7.58	7.81	1.81	1.55	2.24	2.39	2.72	1.62	2.62
52	Male	9	1	1	1	1	Yes	Poor	6.7	7.93	1.43	2.67	2.06	2.21	2.84	4.74	1.74
53	Female	11	1	1	1	1	Yes	Poor	6.79	8.02	1.02	2.76	5.45	5.6	2.43	3.83	2.33
54	Male	17	1	1	1	1	Yes	Poor	7.94	9.17	3.67	1.21	6.6	6.75	2.38	4.98	2.48
55	Male	14	1	1	1	2	Yes	Poor	8.24	9.47	4.67	1.21	9.9	10.05	4.88	5.28	3.78
56	Female	20	1	1	2	1	Yes	Poor	3.62	4.85	1.85	2.59	7.78	2.93	2.76	1.66	2.66
57	Male	40	0	1	1	2	No	Poor	7.31	3.54	1.54	2.28	2.97	4.12	1.45	1.35	1.25
58	Female	8	1	1	2	2	No	Well and moderate	4.13	12.36	3.36	4.1	0.79	4.94	1.27	1.17	1.17
59	Female	11	1	1	2	2	No	Poor	2.92	15.15	3.05	5.89	3.58	4.73	1.06	2.96	0.96
60	Male	41	0	2	1	2	No	Poor	9.92	11.15	1.15	2.89	4.58	4.73	3.06	3.96	2.96
61	Female	21	1	1	2	1	Yes	Poor	9.26	4.49	1.49	2.23	3.92	3.07	2.4	1.3	1.3
62	Male	19	1	1	1	2	Yes	Well and moderate	6.42	7.55	4.35	3.09	9.78	3.93	2.46	3.16	2.36
63	Male	31	1	1	1	2	Yes	Poor	6.92	2.15	2.15	3.15	3.58	5.73	3.06	1.96	2.96
